# Supplementary material
Source: PubMed Central journal article supplement (PMC2937189)

## Chemical Synthesis of 20S-hydroxyvitamin D3, which shows anti-proliferative activity

Wei Li<sup>1</sup>, Jianjun Chen<sup>1</sup>, Zorica Janjetovic<sup>2</sup>, Tae-Kang Kim<sup>2</sup>, Trevor Sweatman<sup>3</sup>, Yan Lu<sup>1</sup>, Jordan Zjawiony<sup>4</sup>, Robert C Tuckey<sup>5</sup>, Duane Miller<sup>1</sup>, Andrzej Slominski<sup>2</sup>

<sup>1</sup>Department of Pharmaceutical Sciences, College of Pharmacy, <sup>2</sup>Department of Pathology and Laboratory Medicine, Center for Cancer Research, <sup>3</sup>Department of Pharmacology, University of Tennessee Health Science Center, Memphis, TN 38163, USA

<sup>4</sup>Department of Pharmacognosy and Research Institute of Pharmaceutical Sciences, School of Pharmacy, University of Mississippi, University, MS 38677, USA

<sup>5</sup>School of Biomedical, Biomolecular and Chemical Sciences, University of Western Australia, Crawley, WA, Australia

Address for all correspondence and reprint requests to:

Wei Li, PhD  
Department of Pharmaceutical Sciences  
University of Tennessee Health Science Center  
847 Monroe Avenue, room 327  
Memphis, TN 38163  
Tel: (901) 448-7532  
Fax: (901) 448-6828  
E-mail: wli@uthsc.edu

### Supplementary materials:

<sup>1</sup>H 1D, <sup>1</sup>H-<sup>1</sup>H 2D, and <sup>1</sup>H-<sup>13</sup>C 2D NMR spectra collected and used for full NMR shift assignments for 20S-(OH)D3 and 20S-(OH)-7DHC are shown in these supplementary materials. All spectra were acquired on a Varian Inova-500 MHz NMR instrument, and spectra were processed with either VNMR 6.1C or ACD Labs 9.0.

# 20S-(OH)D3

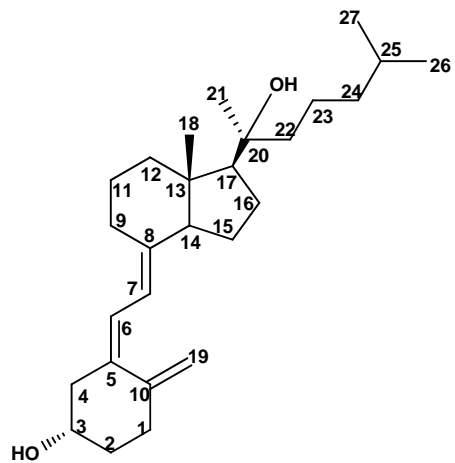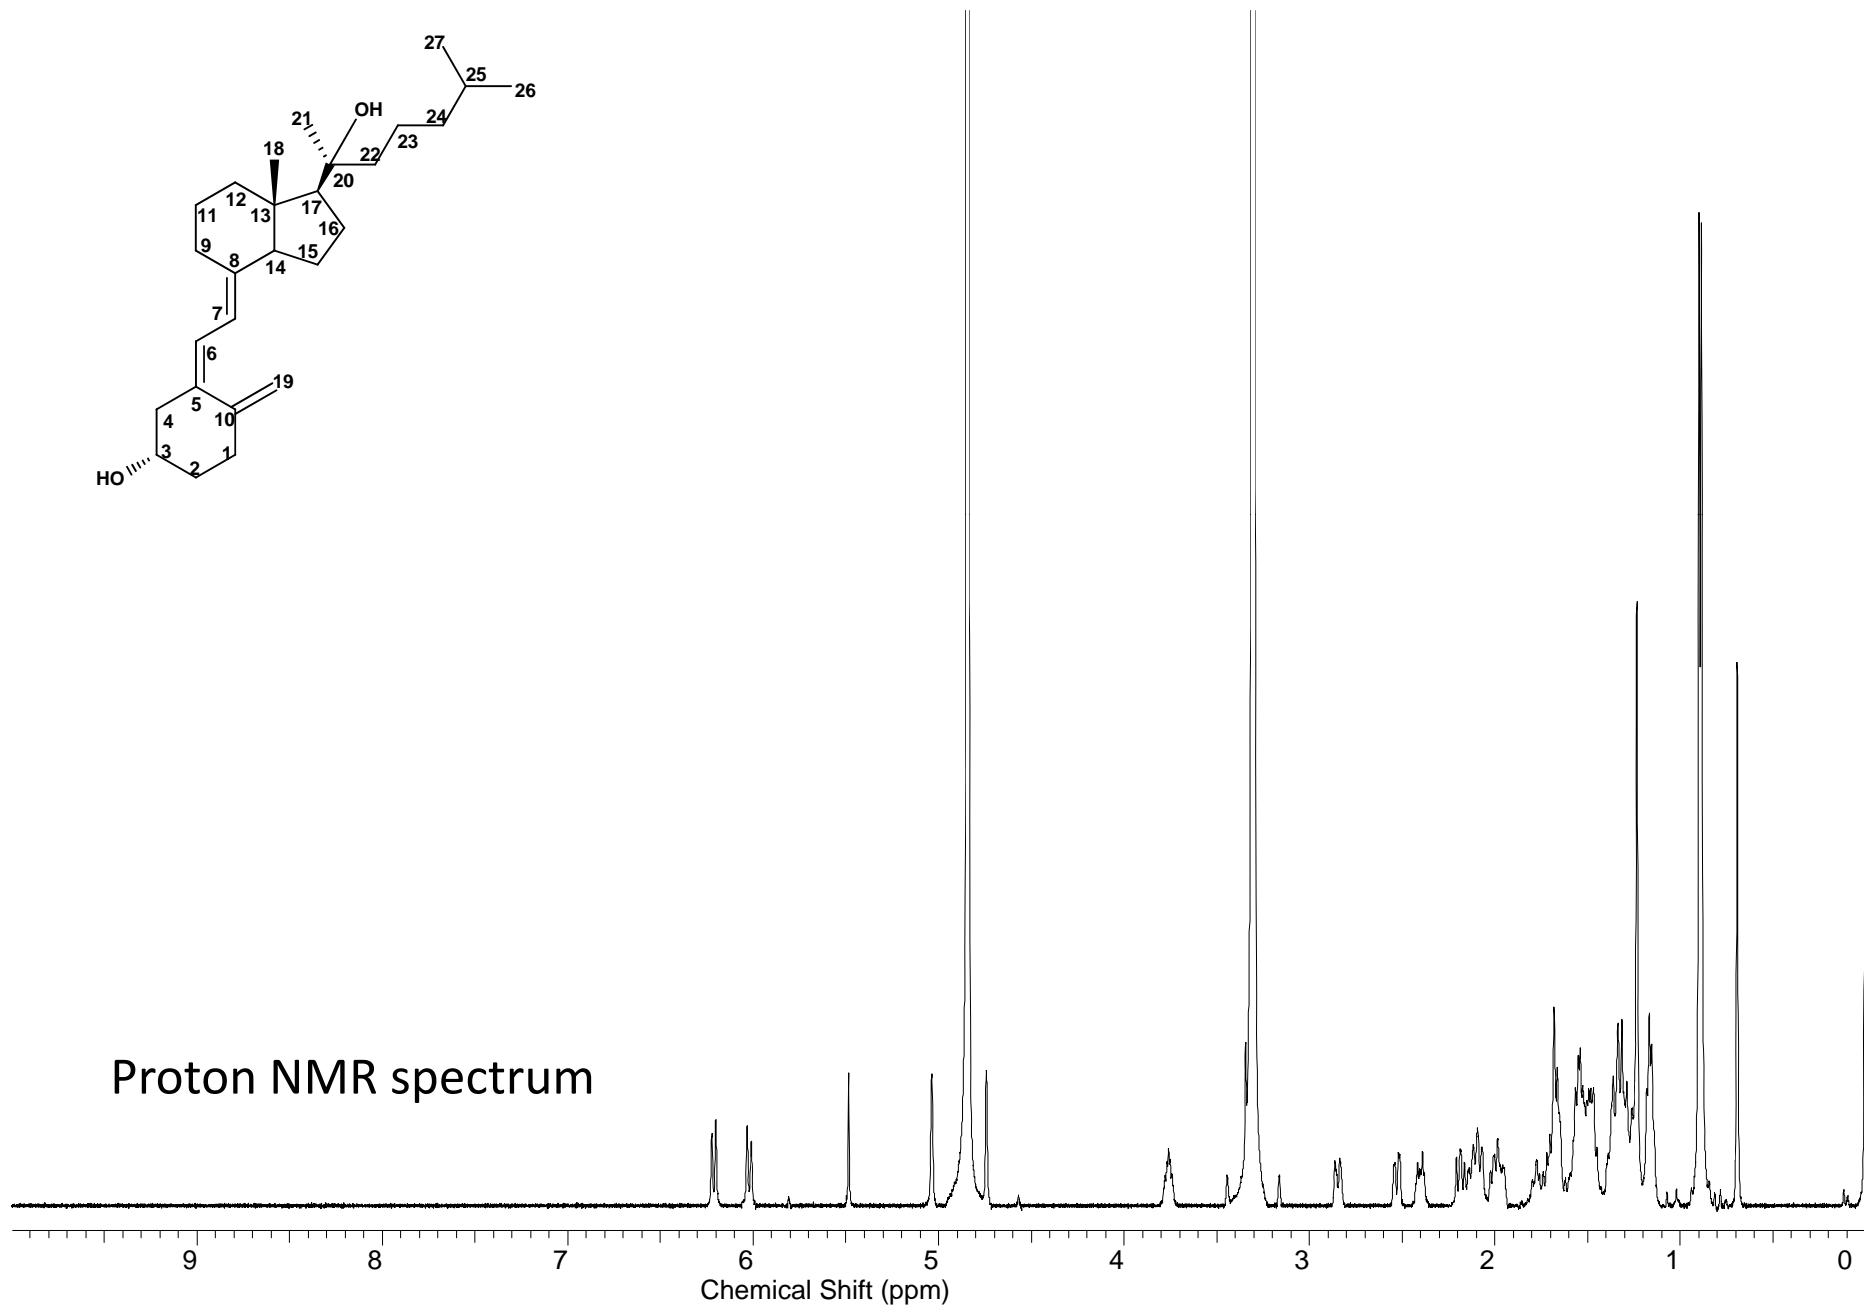

# 20S-(OH)D3

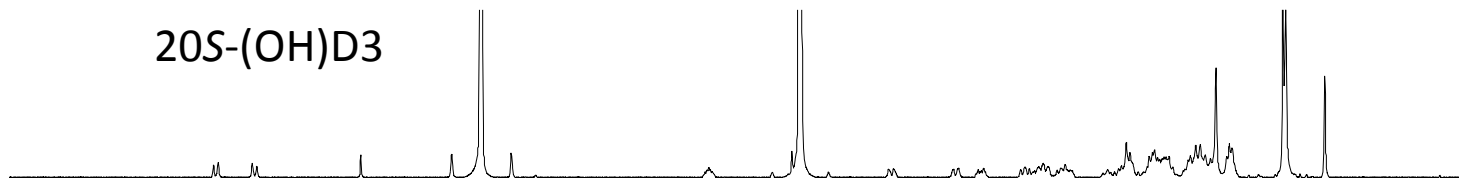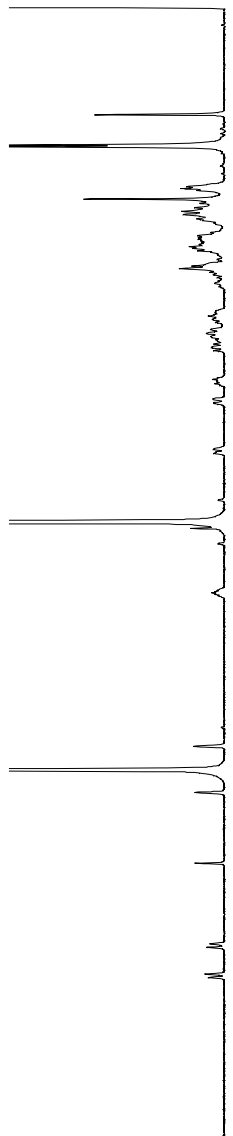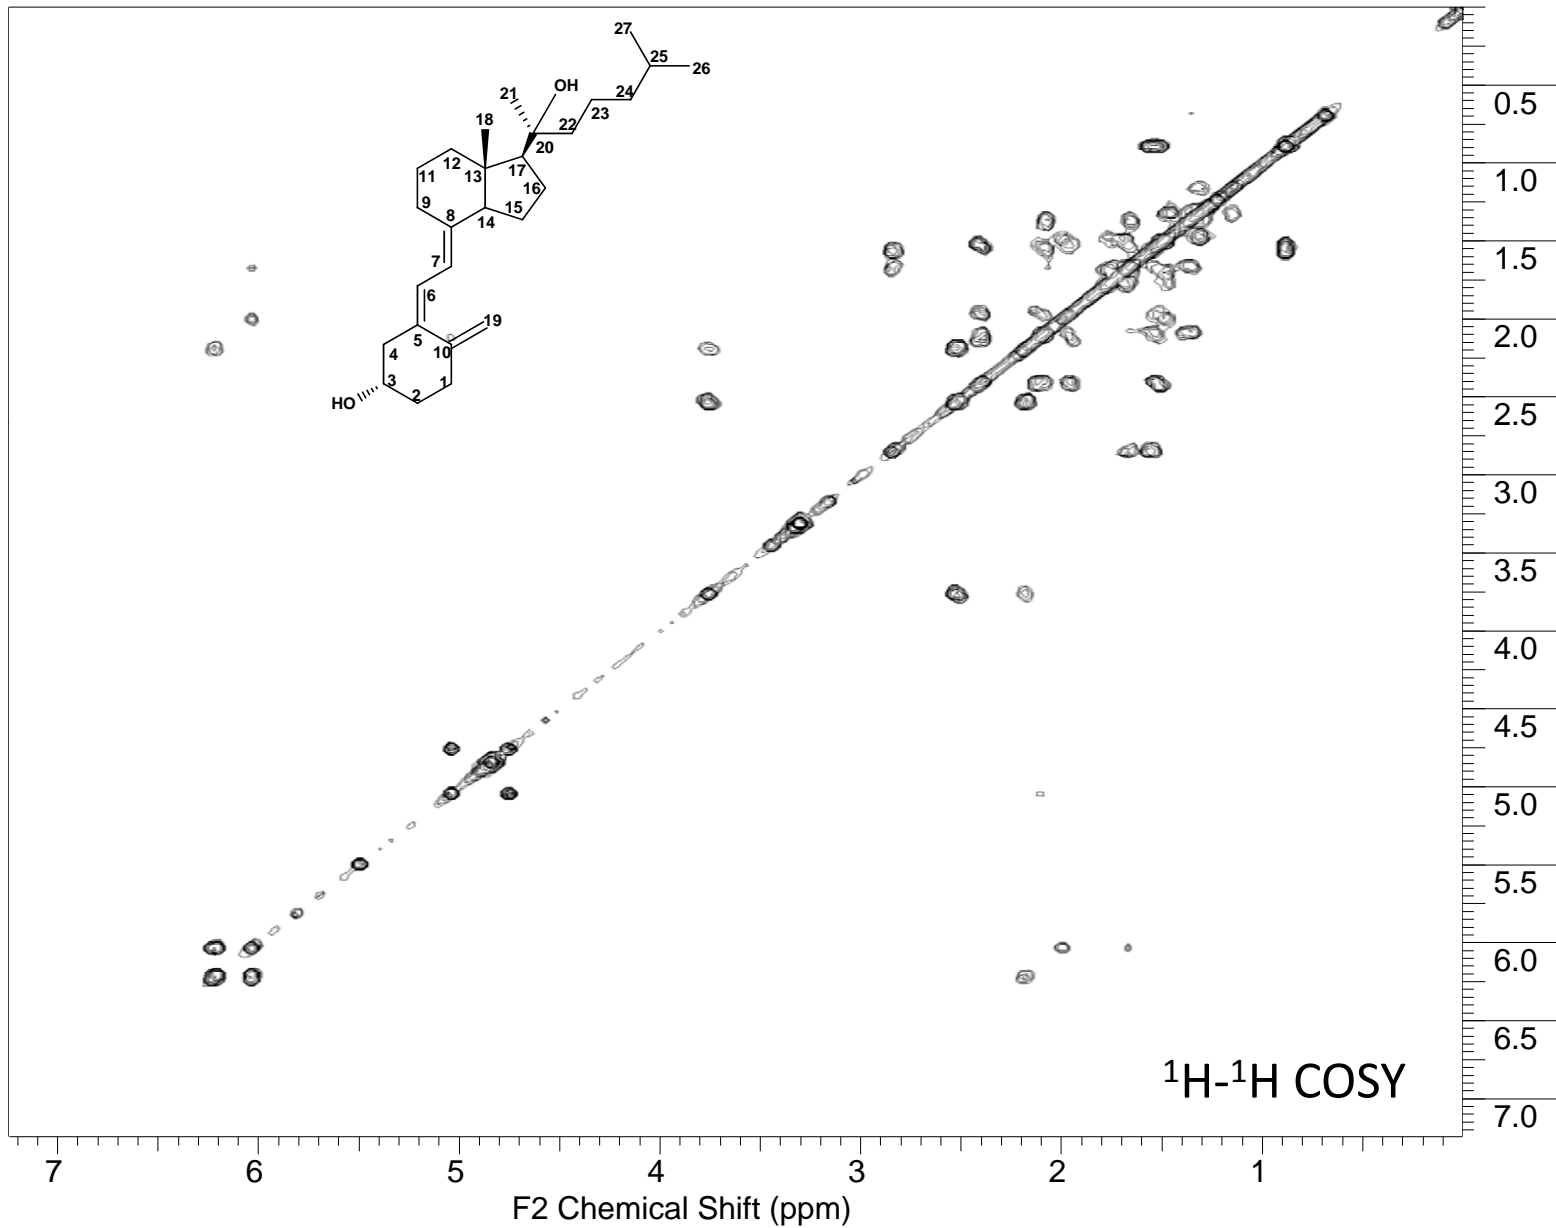

<sup>1</sup>H-<sup>1</sup>H COSY

# 20S-(OH)D3

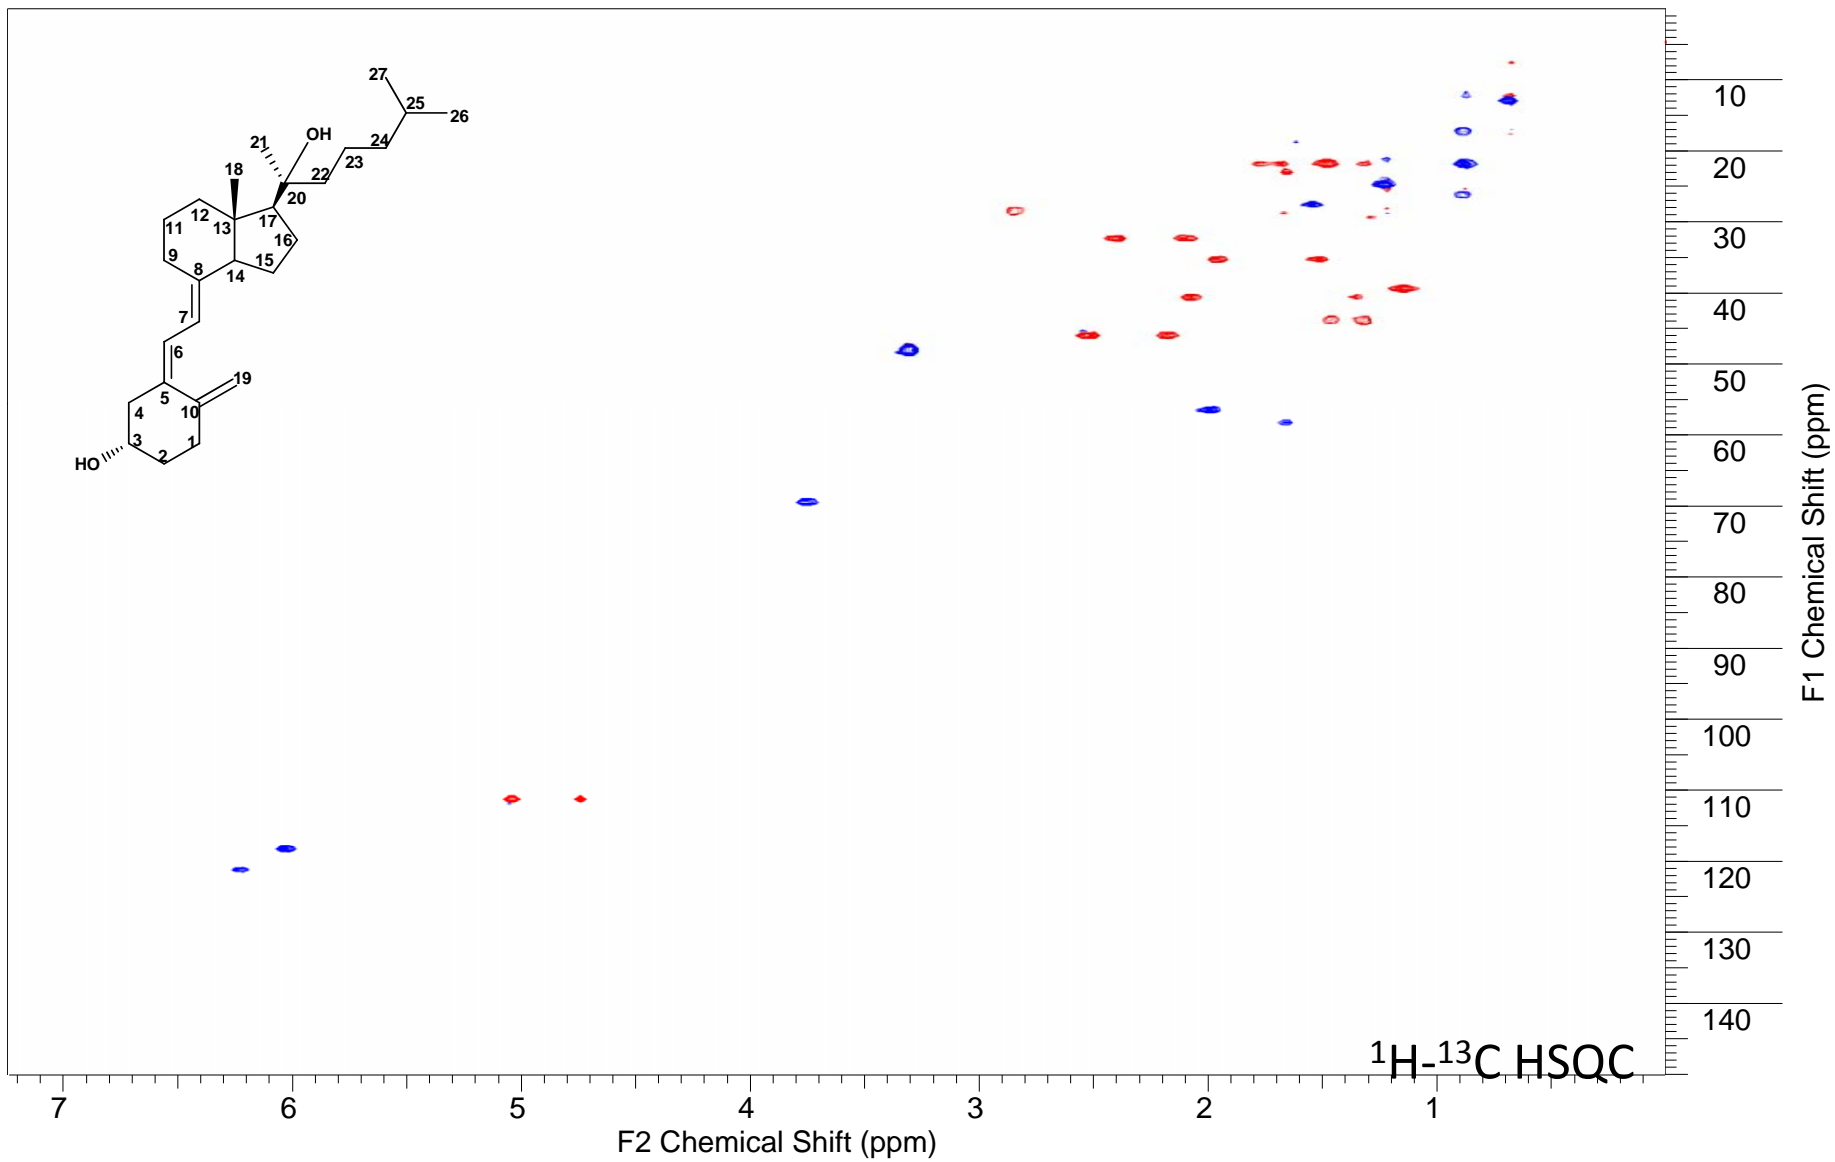

# 20S-(OH)D3

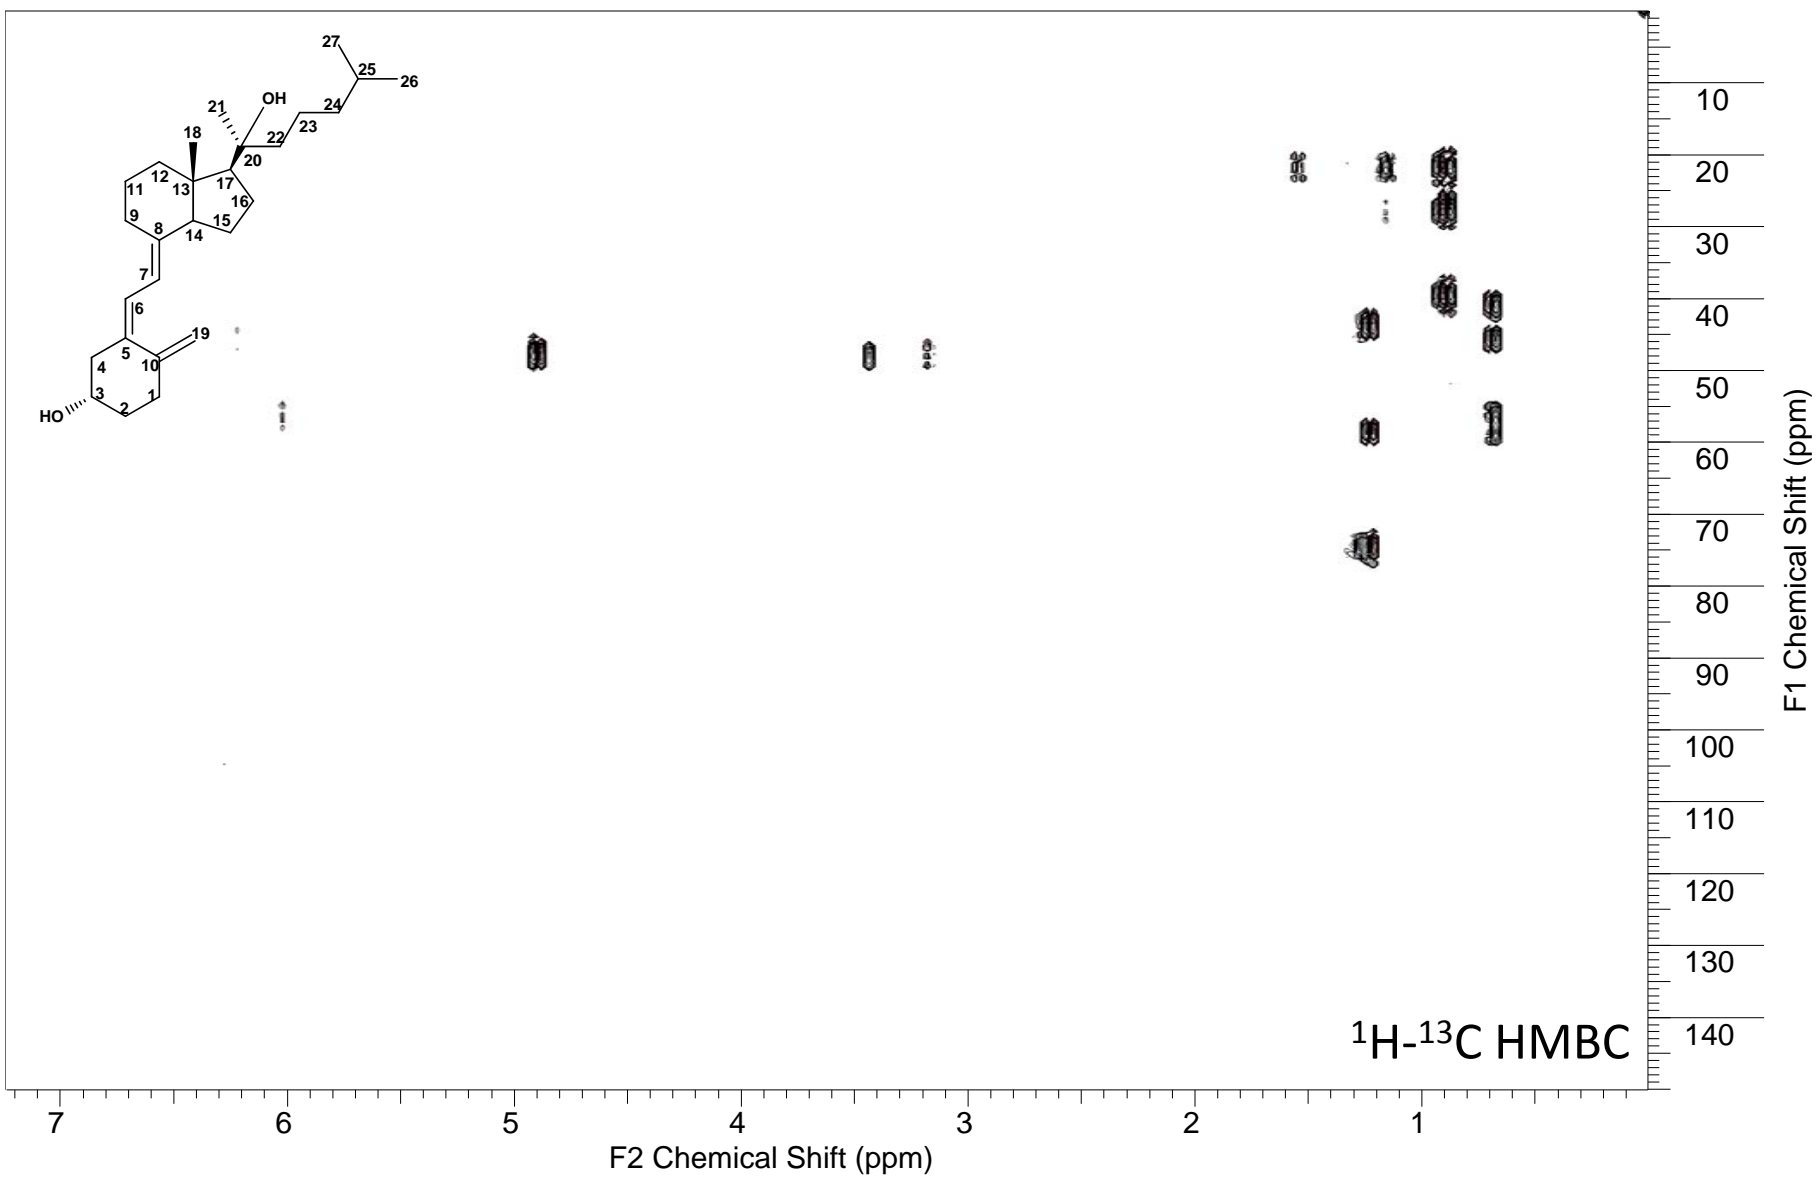

20S-(OH)D3

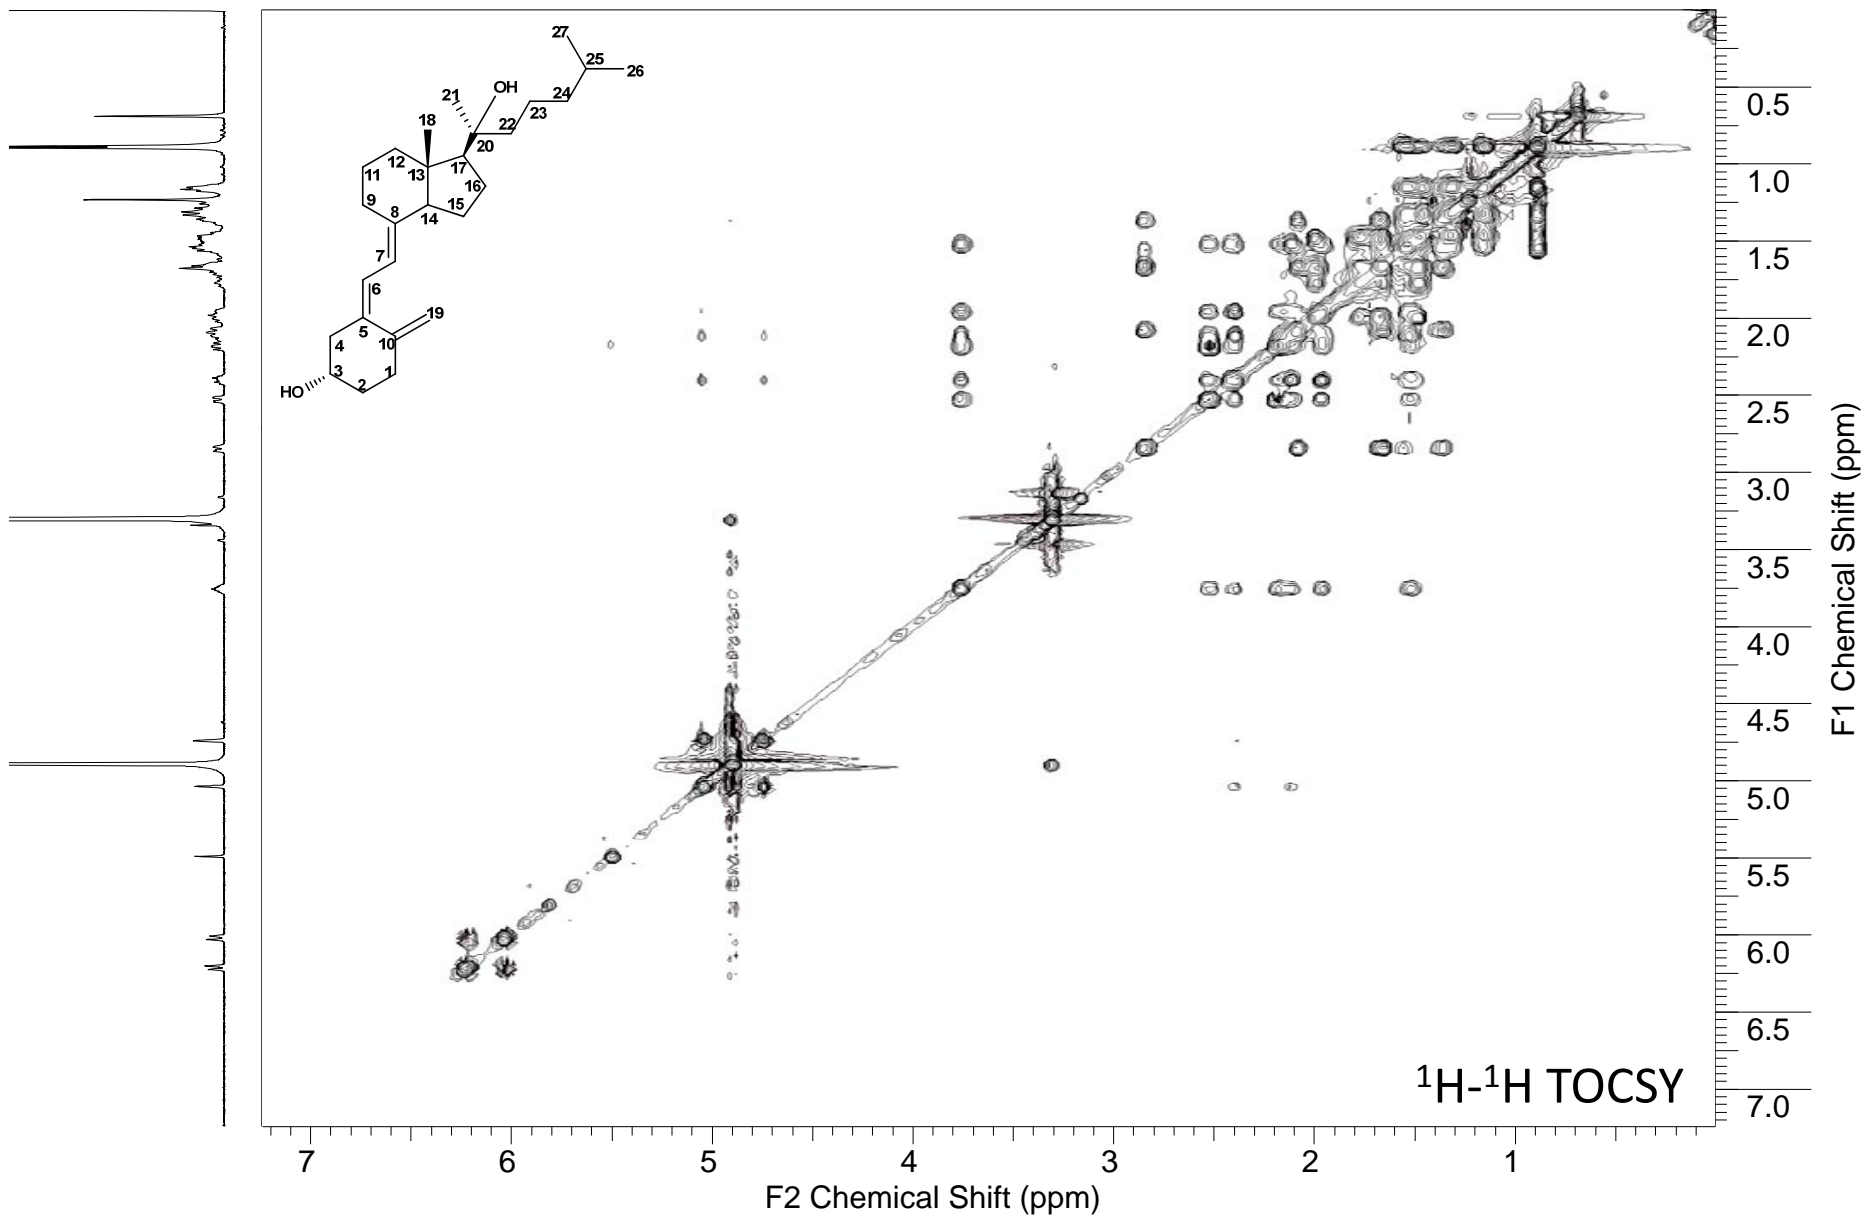

# 20S-(OH)-7DHC

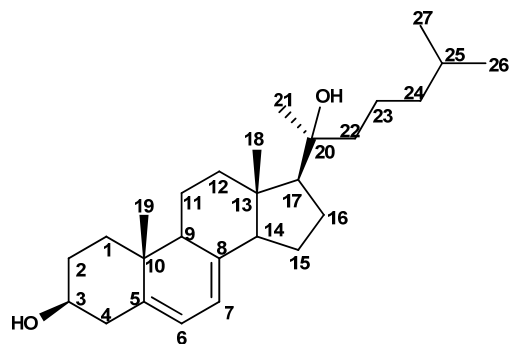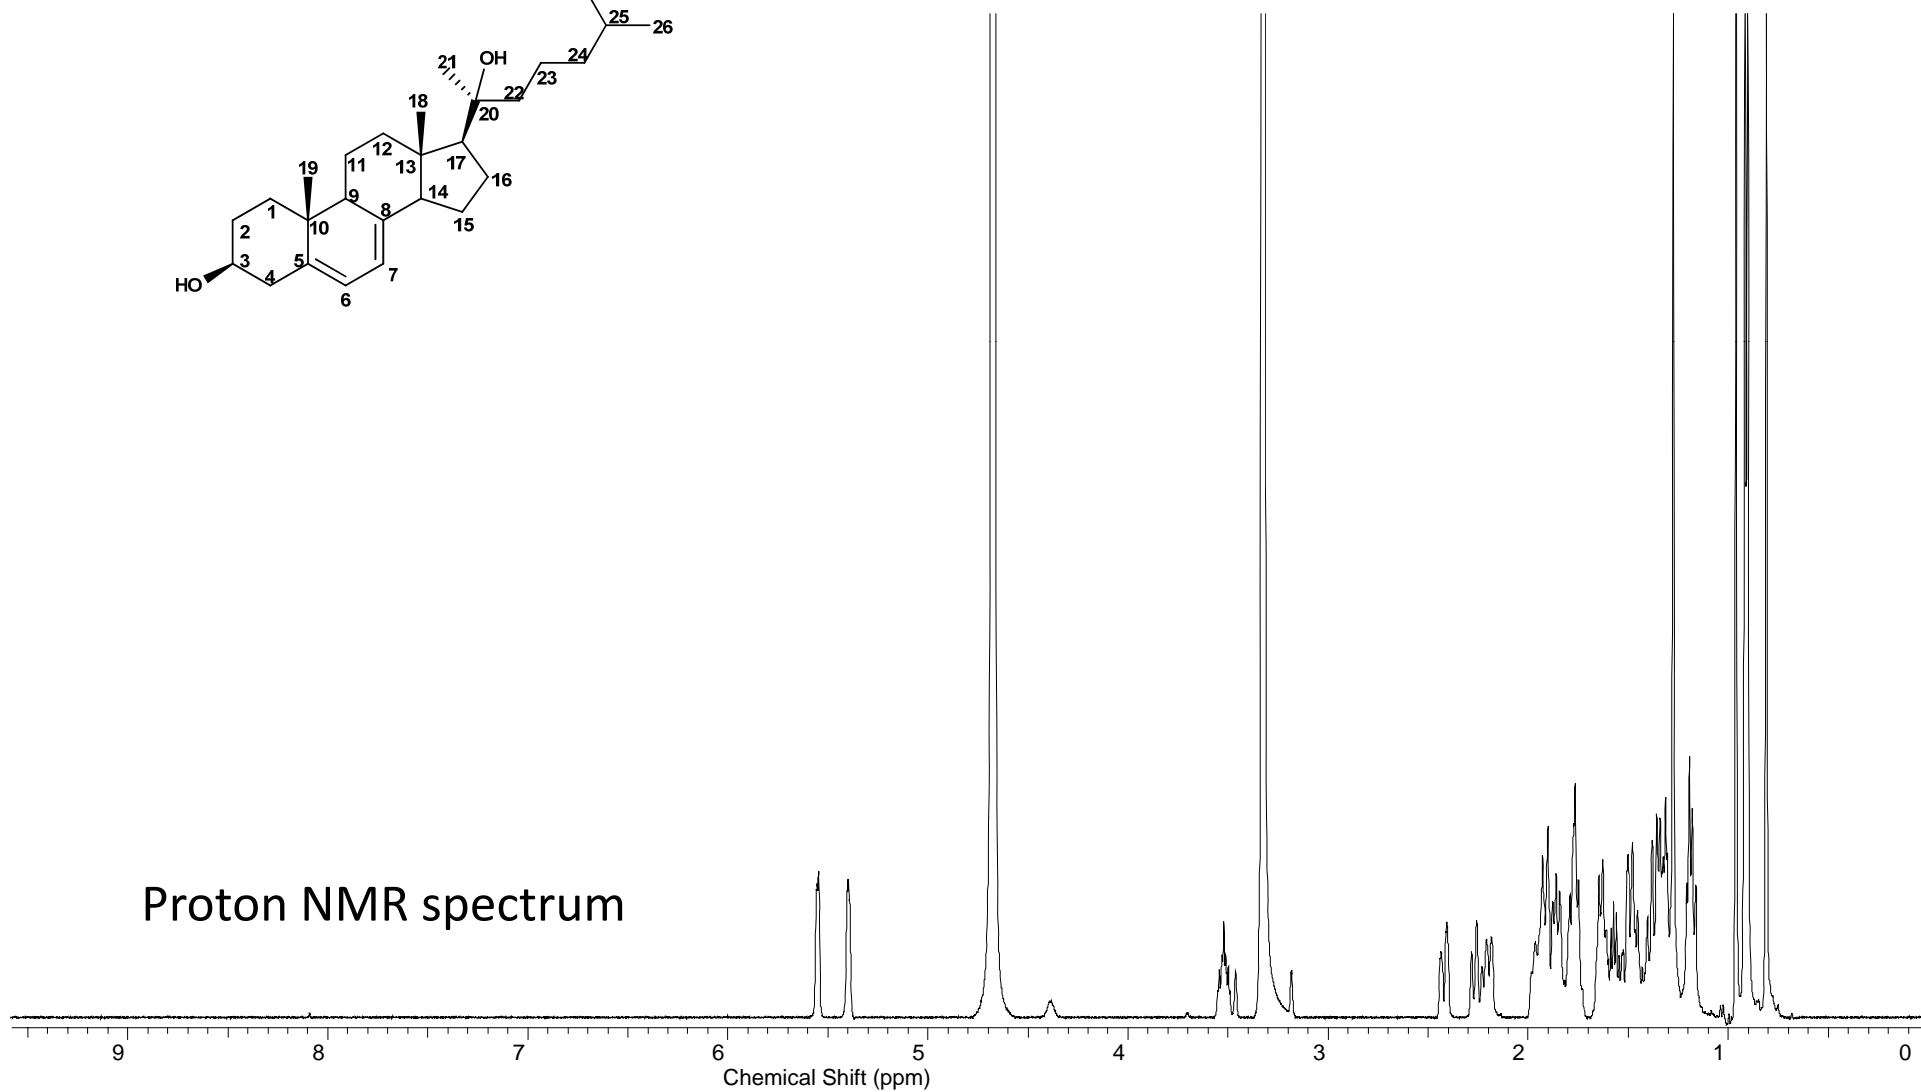

# 20S-(OH)-7DHC

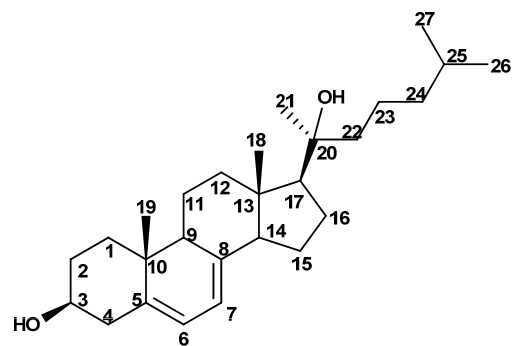

## <sup>13</sup>C NMR spectrum

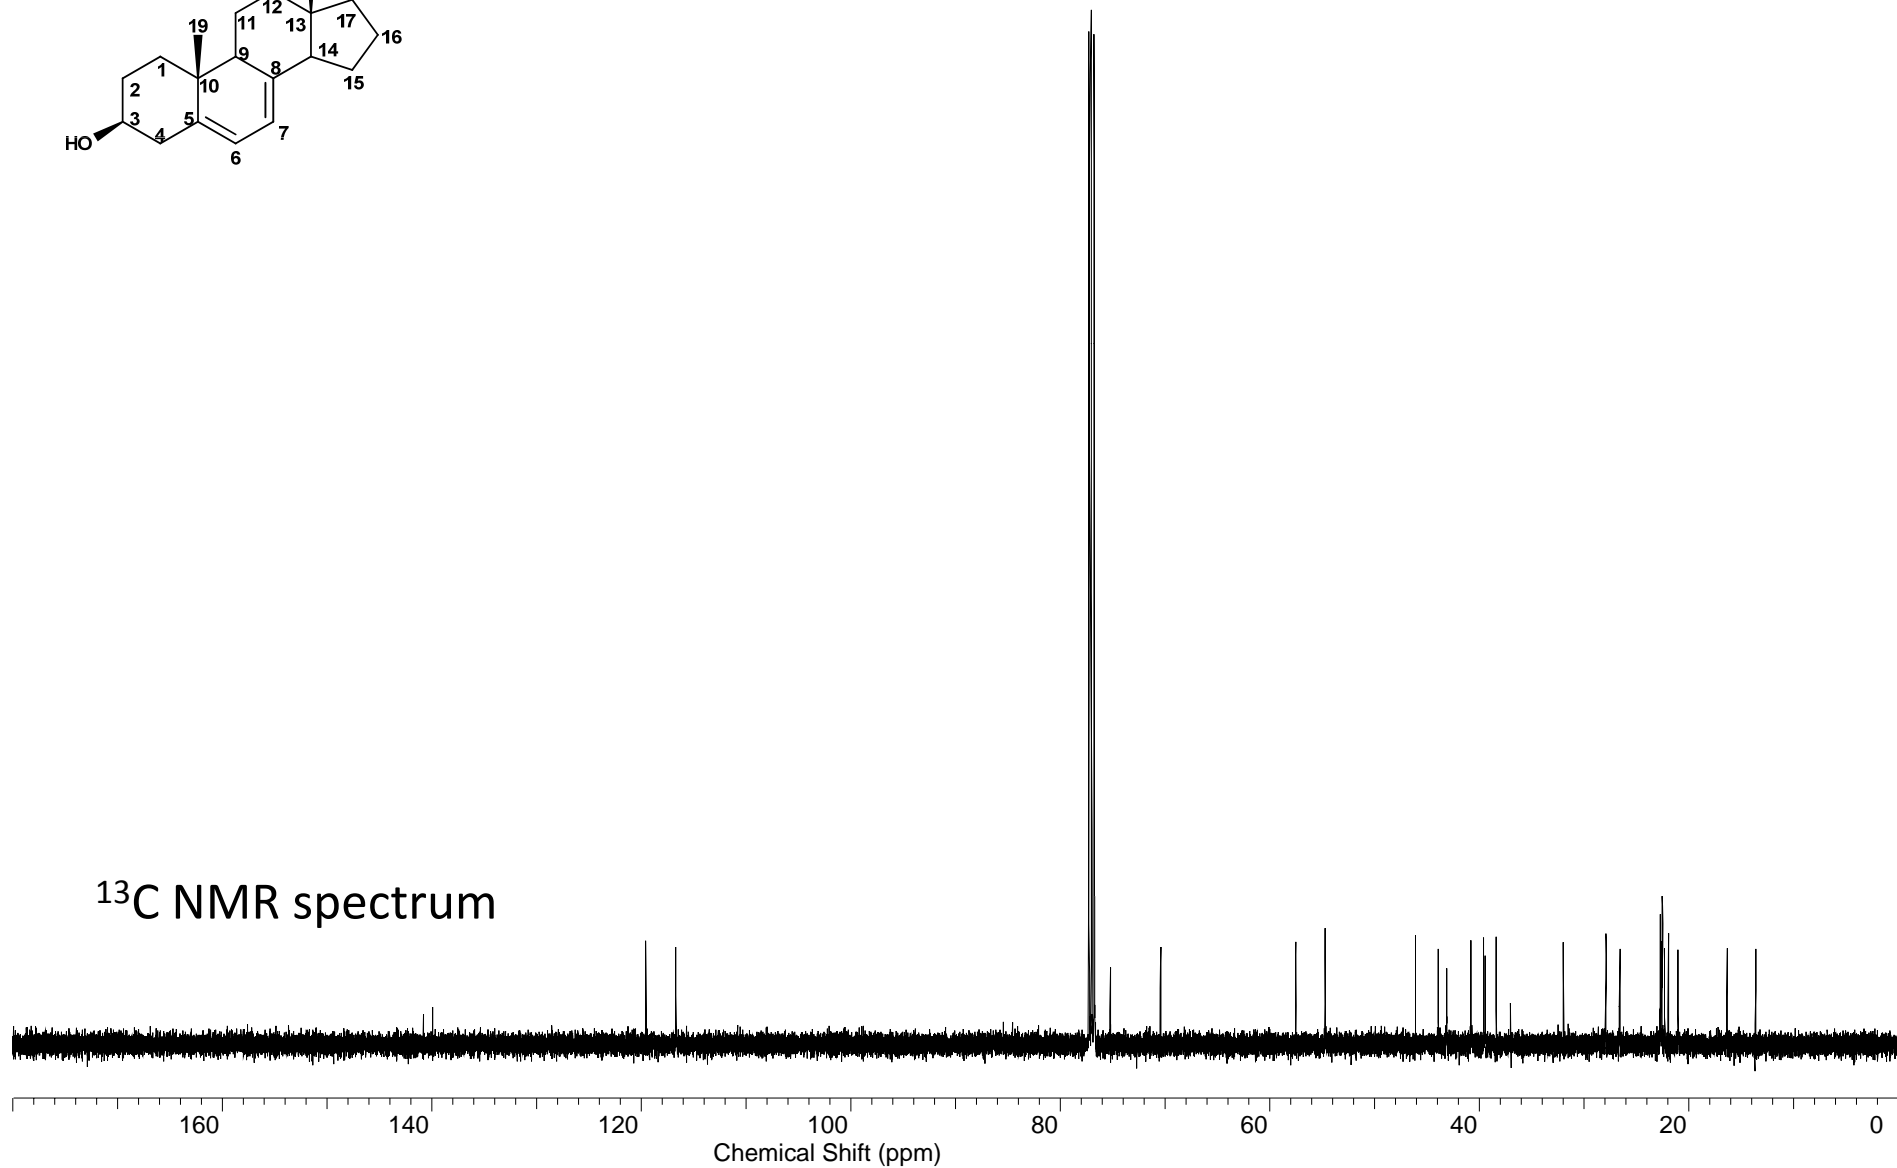



# 20S-(OH)-7DHC

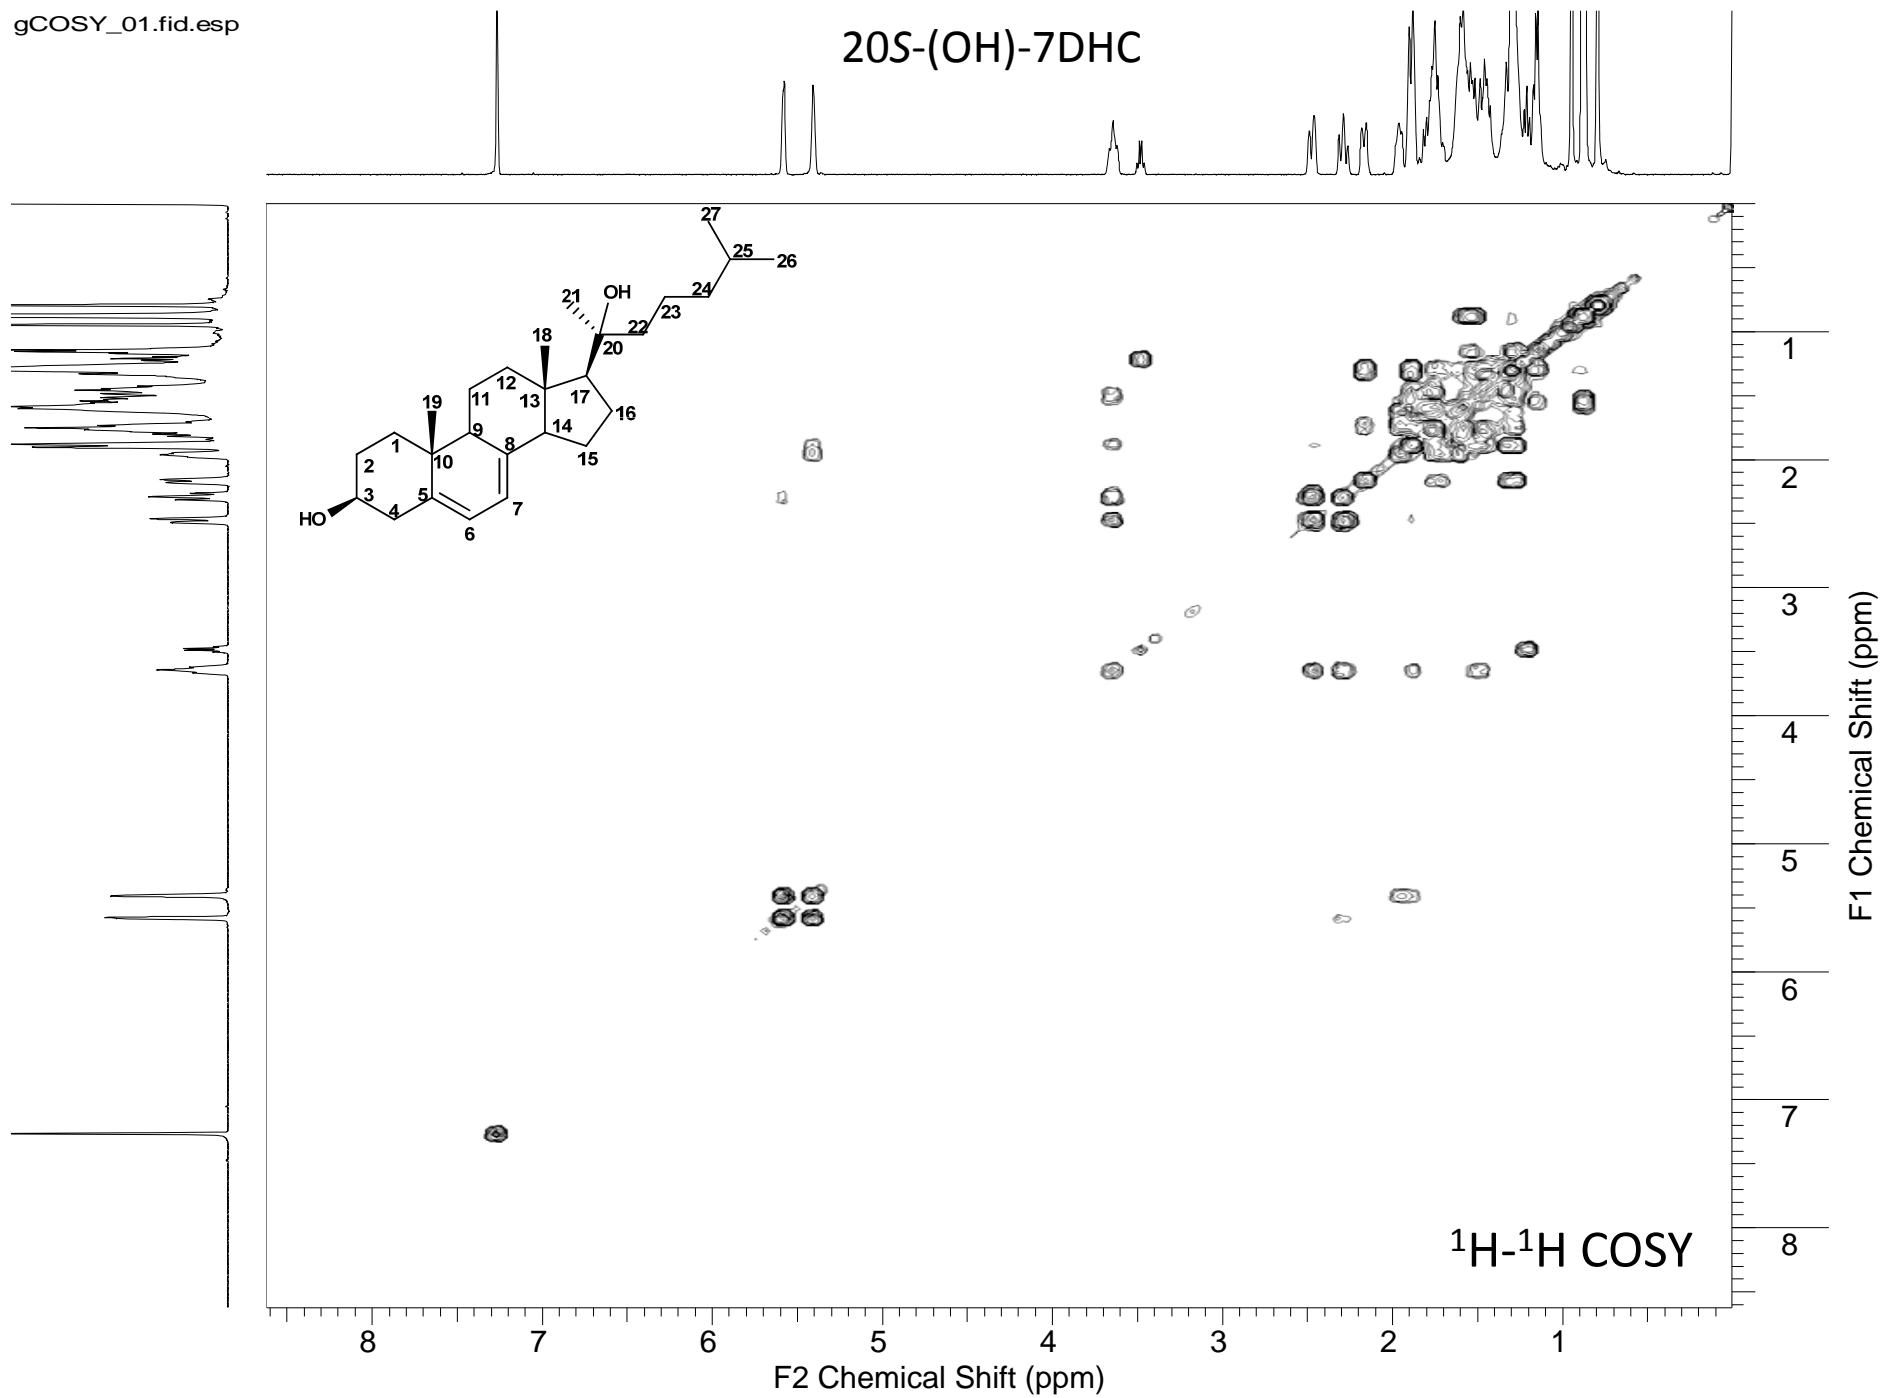

# 20S-(OH)-7DHC

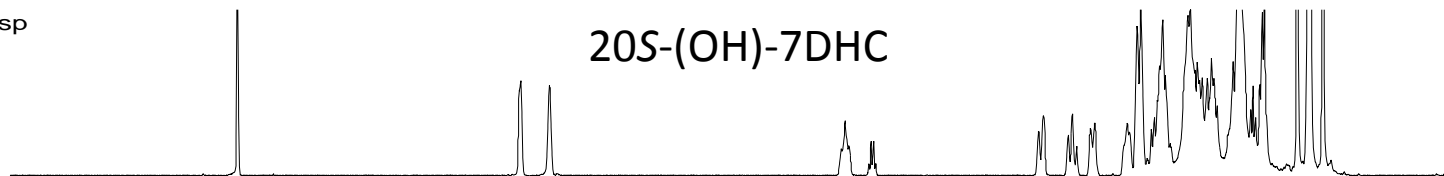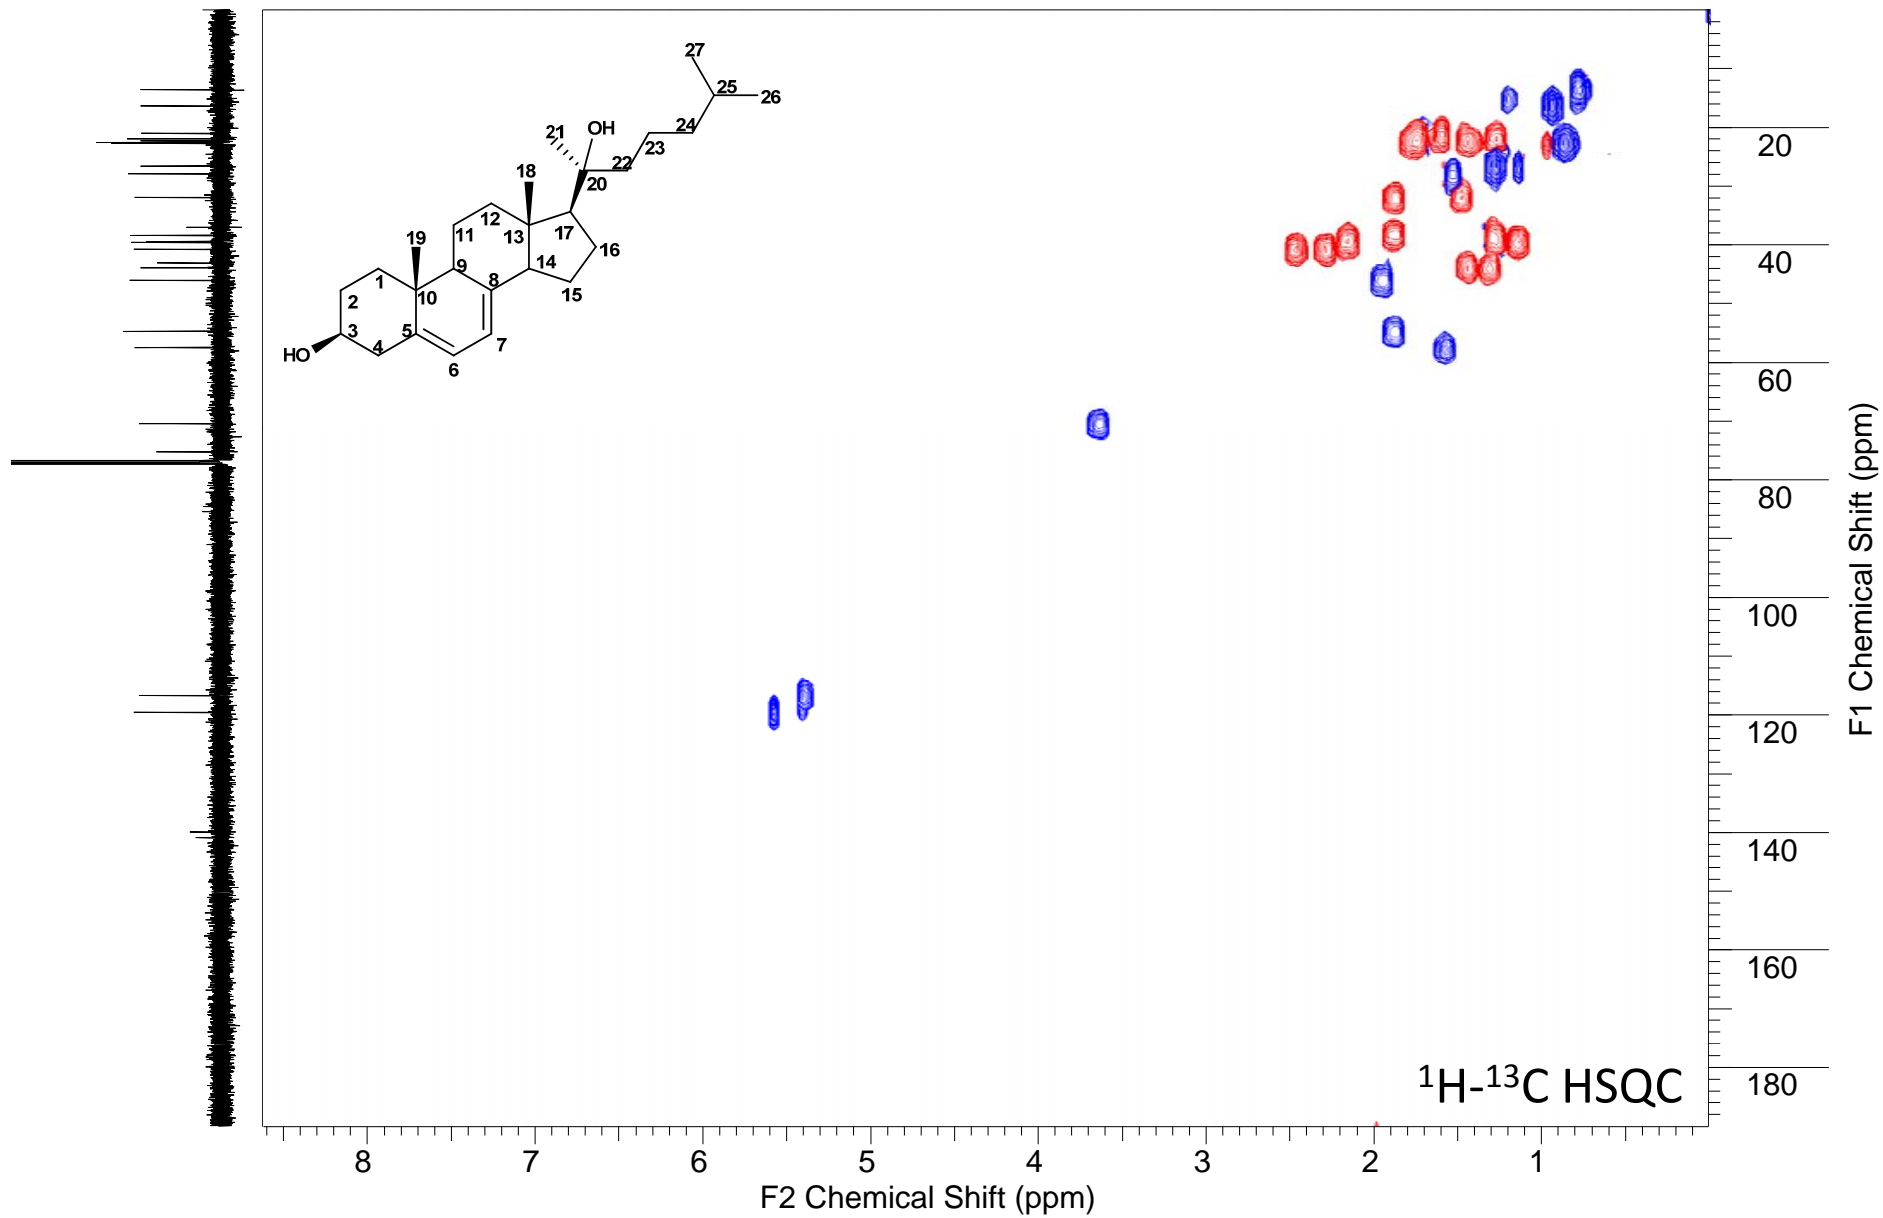

<sup>1</sup>H-<sup>13</sup>C HSQC

# 20S-(OH)-7DHC

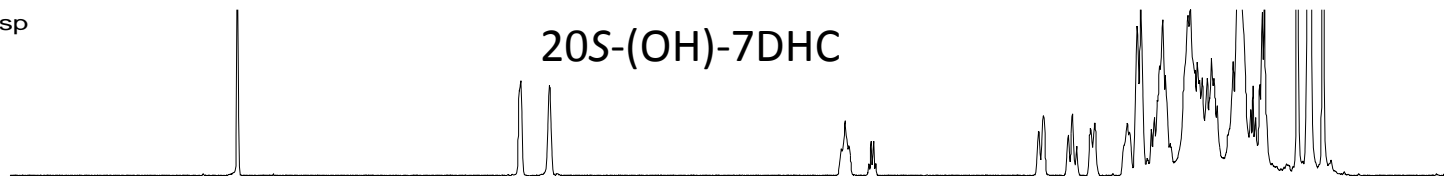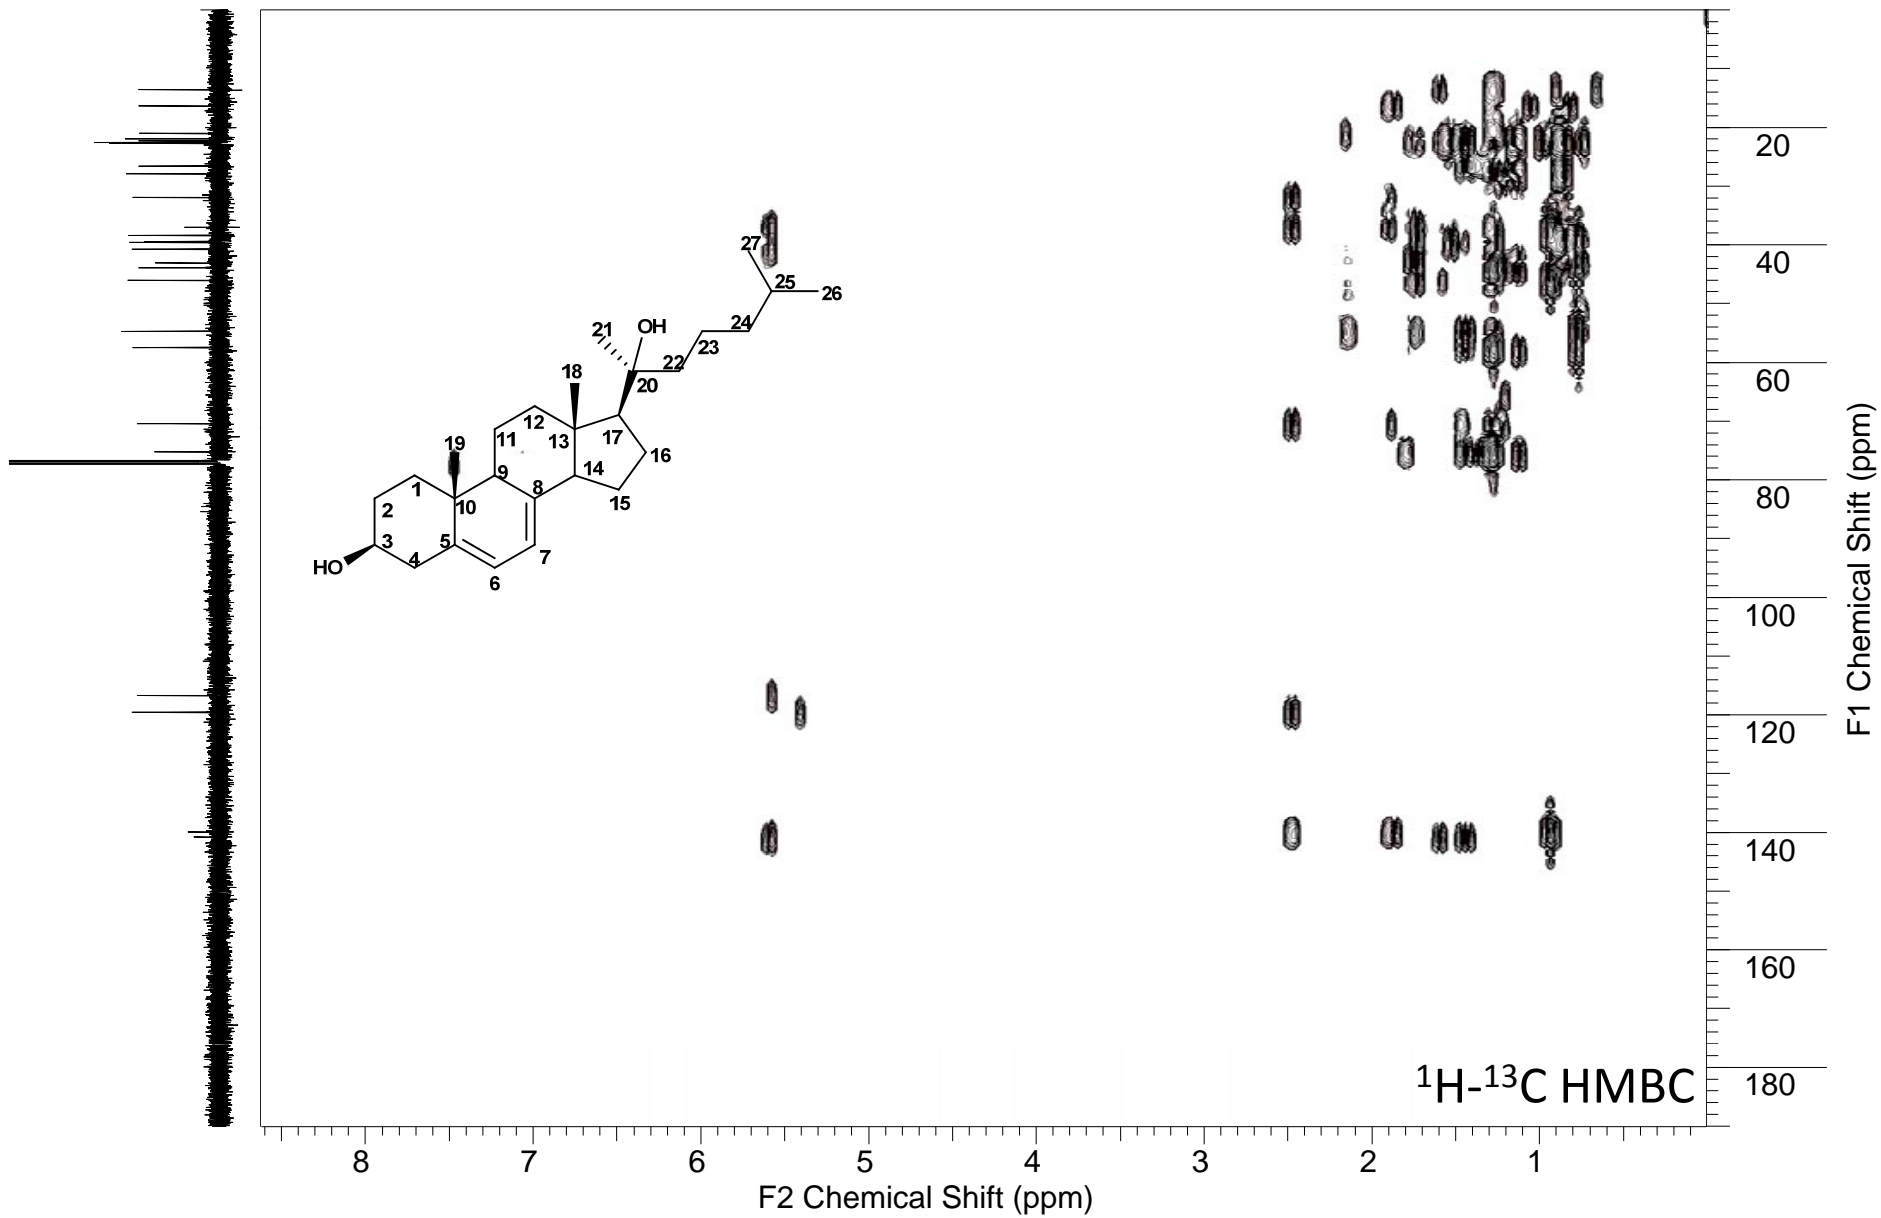

# 20S-(OH)-7DHC

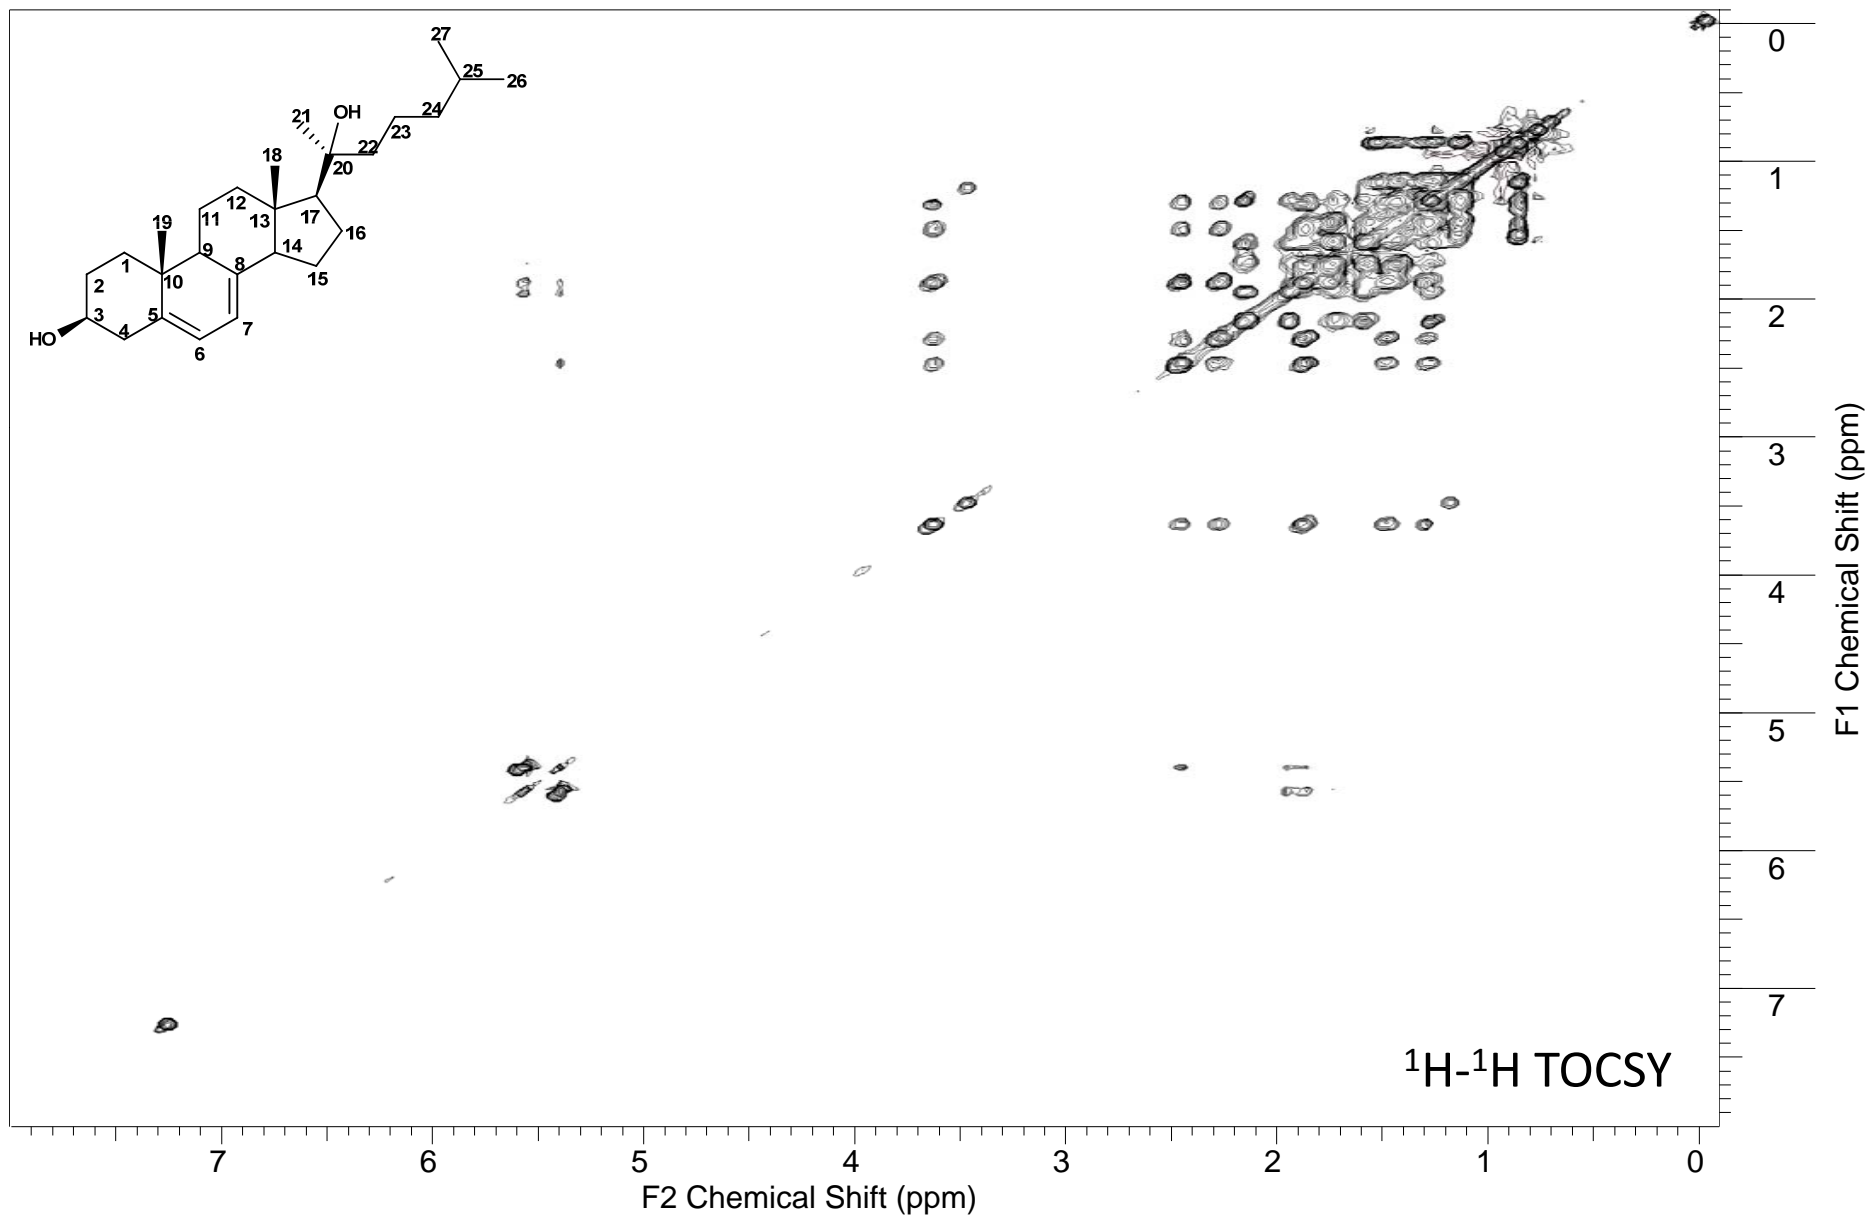

Supplement: NIHMS216297-supplement-01.pdf [file NIHMS216297-supplement-01.pdf]
